# Supplementary material for: Ionic liquid-high performance extractive approach to recover carotenoids fromBactris gasipaesfruits
Source: Royal Society of Chemistry journal article supplement (doi:10.1039/c8gc03283a), 2019-01-01
Supplement: c8gc03283a1.pdf [file c8gc03283a1.pdf]

**SUPPORTING INFORMATION**

**Ionic liquid-high performance extractive approach to recover carotenoids from  
*Bactris gasipaes* fruits**

Leonardo M. de Souza Mesquita<sup>a</sup>, Sónia P. M. Ventura<sup>b</sup>, Anna R. C. Braga<sup>a,c</sup>, Luciana  
P. Pisani<sup>a</sup>, Ana C. R. V. Dias<sup>d</sup>, Veridiana V. de Rosso<sup>a\*</sup>

<sup>a</sup> *Department of Biosciences, Federal University of São Paulo (UNIFESP), Silva Jardim  
Street, 136, Vila Mathias, 11015-020, Santos, SP, Brazil.*

<sup>b</sup> *CICECO - Aveiro Institute of Materials, Department of Chemistry, University of  
Aveiro, 3810-193 Aveiro, Portugal.*

<sup>c</sup> *Department of Exact and Earth Sciences, Federal University of São Paulo  
(UNIFESP), Campus Diadema, Diadema, São Paulo, 09972-270, Brazil.*

*CESAM - Centre for Environmental and Marine Studies, Department of Environment  
and Planning, University of Aveiro, 3810-193 Aveiro, Portugal.*

**\* Corresponding author:** Veridiana Vera de Rosso - Federal University of São Paulo  
(UNIFESP), Silva Jardim Street, 136, Vila Mathias, 11015-020, Santos, SP, Brazil. +55-  
11-99658-3459 – veriderosso@yahoo.com

## Tables

**Table S1.**  $2^{5-1}$  fractional experimental design with three central mixture points for [C<sub>4</sub>mim]Cl and [C<sub>4</sub>mim][BF<sub>4</sub>] using as independent variables the  $R_{(S/L)}$ , number of extractions, time and  $R_{(IL/E)}$ .

| Assay     | IL                                                                            | $R_{(S/L)}$     | Number of extractions | Time (min)      | $R_{(IL/E)}$    | Total carotenoid content            | Total all- <i>trans</i> - $\beta$ -carotene | Total all- <i>trans</i> -lycopene   | Total all- <i>trans</i> - $\gamma$ -carotene |
|-----------|-------------------------------------------------------------------------------|-----------------|-----------------------|-----------------|-----------------|-------------------------------------|---------------------------------------------|-------------------------------------|----------------------------------------------|
|           |                                                                               |                 |                       |                 |                 | ( $\mu\text{g}\cdot\text{g}^{-1}$ ) | ( $\mu\text{g}\cdot\text{g}^{-1}$ )         | ( $\mu\text{g}\cdot\text{g}^{-1}$ ) | ( $\mu\text{g}\cdot\text{g}^{-1}$ )          |
|           | <i>X1</i>                                                                     | <i>X2</i>       | <i>X3</i>             | <i>X4</i>       | <i>X5</i>       | <i>Y1 actual</i>                    | <i>Y2 actual</i>                            | <i>Y3 actual</i>                    | <i>Y4 actual</i>                             |
| <b>1</b>  | <b>-1</b> (1 [C <sub>4</sub> mim]Cl:0 [C <sub>4</sub> mim][BF <sub>4</sub> ]) | <b>-1</b> (1:2) | <b>-1</b> (2)         | <b>-1</b> (2.5) | <b>1</b> (1:3)  | 38.13                               | 17.94                                       | 4.62                                | 5.08                                         |
| <b>2</b>  | <b>1</b> (0 [C <sub>4</sub> mim]Cl:1 [C <sub>4</sub> mim][BF <sub>4</sub> ])  | <b>-1</b> (1:2) | <b>-1</b> (2)         | <b>-1</b> (2.5) | <b>-1</b> (1:1) | 115.09                              | 38.21                                       | 11.34                               | 16.19                                        |
| <b>3</b>  | <b>-1</b> (1 [C <sub>4</sub> mim]Cl:0 [C <sub>4</sub> mim][BF <sub>4</sub> ]) | <b>1</b> (1:4)  | <b>-1</b> (2)         | <b>-1</b> (2.5) | <b>-1</b> (1:1) | 92.06                               | 33.57                                       | 8.39                                | 13.33                                        |
| <b>4</b>  | <b>1</b> (0 [C <sub>4</sub> mim]Cl:1 [C <sub>4</sub> mim][BF <sub>4</sub> ])  | <b>1</b> (1:4)  | <b>-1</b> (2)         | <b>-1</b> (2.5) | <b>1</b> (1:3)  | 118.41                              | 39.61                                       | 10.27                               | 17.45                                        |
| <b>5</b>  | <b>-1</b> (1 [C <sub>4</sub> mim]Cl:0 [C <sub>4</sub> mim][BF <sub>4</sub> ]) | <b>-1</b> (1:2) | <b>1</b> (4)          | <b>-1</b> (2.5) | <b>-1</b> (1:1) | 108.65                              | 35.14                                       | 11.76                               | 14.65                                        |
| <b>6</b>  | <b>1</b> (0 [C <sub>4</sub> mim]Cl:1 [C <sub>4</sub> mim][BF <sub>4</sub> ])  | <b>-1</b> (1:2) | <b>1</b> (4)          | <b>-1</b> (2.5) | <b>1</b> (1:3)  | 127.95                              | 42.00                                       | 11.60                               | 18.52                                        |
| <b>7</b>  | <b>-1</b> (1 [C <sub>4</sub> mim]Cl:0 [C <sub>4</sub> mim][BF <sub>4</sub> ]) | <b>1</b> (1:4)  | <b>1</b> (4)          | <b>-1</b> (2.5) | <b>1</b> (1:3)  | 122.38                              | 40.97                                       | 12.26                               | 17.27                                        |
| <b>8</b>  | <b>1</b> (0 [C <sub>4</sub> mim]Cl:1 [C <sub>4</sub> mim][BF <sub>4</sub> ])  | <b>1</b> (1:4)  | <b>1</b> (4)          | <b>-1</b> (2.5) | <b>-1</b> (1:1) | 132.71                              | 43.09                                       | 10.83                               | 19.79                                        |
| <b>9</b>  | <b>-1</b> (1 [C <sub>4</sub> mim]Cl:0 [C <sub>4</sub> mim][BF <sub>4</sub> ]) | <b>-1</b> (1:2) | <b>-1</b> (2)         | <b>1</b> (7.5)  | <b>-1</b> (1:1) | 96.72                               | 30.69                                       | 11.26                               | 13.96                                        |
| <b>10</b> | <b>1</b> (0 [C <sub>4</sub> mim]Cl:1 [C <sub>4</sub> mim][BF <sub>4</sub> ])  | <b>-1</b> (1:2) | <b>-1</b> (2)         | <b>1</b> (7.5)  | <b>1</b> (1:3)  | 128.16                              | 43.26                                       | 12.13                               | 18.42                                        |
| <b>11</b> | <b>-1</b> (1 [C <sub>4</sub> mim]Cl:0 [C <sub>4</sub> mim][BF <sub>4</sub> ]) | <b>1</b> (1:4)  | <b>-1</b> (2)         | <b>1</b> (7.5)  | <b>1</b> (1:3)  | 114.71                              | 36.89                                       | 12.98                               | 16.09                                        |
| <b>12</b> | <b>1</b> (0 [C <sub>4</sub> mim]Cl:1 [C <sub>4</sub> mim][BF <sub>4</sub> ])  | <b>1</b> (1:4)  | <b>-1</b> (2)         | <b>1</b> (7.5)  | <b>-1</b> (1:1) | 117.69                              | 39.7                                        | 10.56                               | 17.00                                        |
| <b>13</b> | <b>-1</b> (1 [C <sub>4</sub> mim]Cl:0 [C <sub>4</sub> mim][BF <sub>4</sub> ]) | <b>-1</b> (1:2) | <b>1</b> (4)          | <b>1</b> (7.5)  | <b>1</b> (1:3)  | 112.26                              | 35.09                                       | 14.10                               | 16.44                                        |
| <b>14</b> | <b>1</b> (0 [C <sub>4</sub> mim]Cl:1 [C <sub>4</sub> mim][BF <sub>4</sub> ])  | <b>-1</b> (1:2) | <b>1</b> (4)          | <b>1</b> (7.5)  | <b>-1</b> (1:1) | 127.47                              | 41.42                                       | 13.48                               | 18.79                                        |
| <b>15</b> | <b>-1</b> (1 [C <sub>4</sub> mim]Cl:0 [C <sub>4</sub> mim][BF <sub>4</sub> ]) | <b>1</b> (1:4)  | <b>1</b> (4)          | <b>1</b> (7.5)  | <b>-1</b> (1:1) | 103.77                              | 33.85                                       | 13.21                               | 14.70                                        |
| <b>16</b> | <b>1</b> (0 [C <sub>4</sub> mim]Cl:1 [C <sub>4</sub> mim][BF <sub>4</sub> ])  | <b>1</b> (1:4)  | <b>1</b> (4)          | <b>1</b> (7.5)  | <b>1</b> (1:3)  | 119.10                              | 39.12                                       | 10.59                               | 39.13                                        |
| <b>17</b> | <b>0</b> (1 [C <sub>4</sub> mim]Cl:1 [C <sub>4</sub> mim][BF <sub>4</sub> ])  | <b>0</b> (1:3)  | <b>0</b> (3)          | <b>0</b> (5)    | <b>0</b> (1:2)  | 107.68                              | 35.16                                       | 11.78                               | 15.14                                        |
| <b>18</b> | <b>0</b> (1 [C <sub>4</sub> mim]Cl:1 [C <sub>4</sub> mim][BF <sub>4</sub> ])  | <b>0</b> (1:3)  | <b>0</b> (3)          | <b>0</b> (5)    | <b>0</b> (1:2)  | 108.55                              | 35.53                                       | 11.81                               | 15.37                                        |
| <b>19</b> | <b>0</b> (1 [C <sub>4</sub> mim]Cl:1 [C <sub>4</sub> mim][BF <sub>4</sub> ])  | <b>0</b> (1:3)  | <b>0</b> (3)          | <b>0</b> (5)    | <b>0</b> (1:2)  | 100.84                              | 42.73                                       | 10.65                               | 12.65                                        |

**Table S2.** Real and coded values and experimental values for total carotenoids content and major compounds extracted by [C<sub>4</sub>mim][BF<sub>4</sub>] in the CCRD (2<sup>3</sup>) assays.

| Assay | R <sub>(S/L)</sub>    | Number of extractions | Time (min)          | Total carotenoid content<br>( $\mu\text{g}_{\text{carotenoids}} \cdot \text{g}_{\text{dried biomass}}^{-1}$ ) | Total all- <i>trans</i> - $\beta$ -carotene<br>( $\mu\text{g}_{\text{carotenoids}} \cdot \text{g}_{\text{dried biomass}}^{-1}$ ) | Total all- <i>trans</i> -lycopene<br>( $\mu\text{g}_{\text{carotenoids}} \cdot \text{g}_{\text{dried biomass}}^{-1}$ ) | Total all- <i>trans</i> - $\gamma$ -carotene<br>( $\mu\text{g}_{\text{carotenoids}} \cdot \text{g}_{\text{dried biomass}}^{-1}$ ) |
|-------|-----------------------|-----------------------|---------------------|---------------------------------------------------------------------------------------------------------------|----------------------------------------------------------------------------------------------------------------------------------|------------------------------------------------------------------------------------------------------------------------|-----------------------------------------------------------------------------------------------------------------------------------|
|       | <i>X1</i>             | <i>X2</i>             | <i>X3</i>           | <i>Y1</i>                                                                                                     | <i>Y2</i>                                                                                                                        | <i>Y3</i>                                                                                                              | <i>Y4</i>                                                                                                                         |
| 1     | <b>-1</b><br>(1:2)    | <b>-1</b> (2)         | <b>-1</b> (5)       | 130.64                                                                                                        | 41.69                                                                                                                            | 12.03                                                                                                                  | 19.13                                                                                                                             |
| 2     | <b>1</b><br>(1:6)     | <b>-1</b> (2)         | <b>-1</b> (5)       | 130.11                                                                                                        | 40.9                                                                                                                             | 12.73                                                                                                                  | 19.48                                                                                                                             |
| 3     | <b>-1</b><br>(1:2)    | <b>1</b> (6)          | <b>-1</b> (5)       | 121.64                                                                                                        | 38.36                                                                                                                            | 13.6                                                                                                                   | 18.15                                                                                                                             |
| 4     | <b>1</b><br>(1:6)     | <b>1</b> (6)          | <b>-1</b> (5)       | 113.78                                                                                                        | 35.5                                                                                                                             | 11.7                                                                                                                   | 17.11                                                                                                                             |
| 5     | <b>-1</b><br>(1:2)    | <b>-1</b> (2)         | <b>1</b><br>(10)    | 134.96                                                                                                        | 42.03                                                                                                                            | 12.7                                                                                                                   | 20.43                                                                                                                             |
| 6     | <b>1</b><br>(1:6)     | <b>-1</b> (2)         | <b>1</b><br>(10)    | 117.17                                                                                                        | 35.53                                                                                                                            | 12.44                                                                                                                  | 18.06                                                                                                                             |
| 7     | <b>-1</b><br>(1:2)    | <b>1</b> (6)          | <b>1</b><br>(10)    | 157.03                                                                                                        | 44.5                                                                                                                             | 15.28                                                                                                                  | 20.8                                                                                                                              |
| 8     | <b>1</b><br>(1:6)     | <b>1</b> (6)          | <b>1</b><br>(10)    | 144.57                                                                                                        | 47.7                                                                                                                             | 13.8                                                                                                                   | 24.17                                                                                                                             |
| 9     | <b>-1.68</b><br>(1:1) | <b>0</b> (4)          | <b>0</b><br>(7.5)   | 145.8                                                                                                         | 41.69                                                                                                                            | 12.72                                                                                                                  | 19.04                                                                                                                             |
| 10    | <b>1.68</b><br>(1:7)  | <b>0</b> (4)          | <b>0</b><br>(7.5)   | 114.07                                                                                                        | 37.1                                                                                                                             | 10.31                                                                                                                  | 17.26                                                                                                                             |
| 11    | <b>0</b><br>(1:4)     | <b>-1.68</b> (1)      | <b>0</b><br>(7.5)   | 98.66                                                                                                         | 32.7                                                                                                                             | 9.39                                                                                                                   | 14.7                                                                                                                              |
| 12    | <b>0</b><br>(1:4)     | <b>1.68</b> (7)       | <b>0</b><br>(7.5)   | 125.64                                                                                                        | 40.13                                                                                                                            | 12.07                                                                                                                  | 19.05                                                                                                                             |
| 13    | <b>0</b><br>(1:4)     | <b>0</b> (4)          | <b>-1.68</b><br>(3) | 109.10                                                                                                        | 37.08                                                                                                                            | 9.42                                                                                                                   | 16.16                                                                                                                             |
| 14    | <b>0</b><br>(1:4)     | <b>0</b> (4)          | <b>1.68</b><br>(12) | 157.65                                                                                                        | 48.03                                                                                                                            | 16.17                                                                                                                  | 22.86                                                                                                                             |
| 15    | <b>0</b><br>(1:4)     | <b>0</b> (4)          | <b>0</b><br>(7.5)   | 126.06                                                                                                        | 41.95                                                                                                                            | 12.06                                                                                                                  | 17.62                                                                                                                             |
| 16    | <b>0</b><br>(1:4)     | <b>0</b> (4)          | <b>0</b><br>(7.5)   | 143.98                                                                                                        | 44.21                                                                                                                            | 13.13                                                                                                                  | 21.8                                                                                                                              |
| 17    | <b>0</b><br>(1:4)     | <b>0</b> (4)          | <b>0</b><br>(7.5)   | 146.47                                                                                                        | 45.01                                                                                                                            | 13.17                                                                                                                  | 22.15                                                                                                                             |

**Table S3.** Predicted results found through the mathematical model developed and the respective relative deviation from the independent variables  $R_{(S/L)}$ , number of extractions and time to define the  $2^3$  CCRD for  $[C_4mim][BF_4]$ . V1, V2, and V3 represent the validation assays.

| Assays                                                                                                                                               | $R_{(S/L)}$ | Number of extractions | Time (min) | Experimental values | Predicted values | Relative deviation (%) |
|------------------------------------------------------------------------------------------------------------------------------------------------------|-------------|-----------------------|------------|---------------------|------------------|------------------------|
| <b>Total carotenoids content (<math>\mu\text{g}_{\text{carotenoids}} \cdot \text{g}_{\text{dried biomass}}^{-1}</math>)</b>                          |             |                       |            |                     |                  |                        |
| V1                                                                                                                                                   |             |                       |            | 192.09              |                  | 14.17                  |
| V2                                                                                                                                                   | -1.68       | 0                     | +1.68      | 163.65              | 164.86           | -0.74                  |
| V3                                                                                                                                                   |             |                       |            | 159.56              |                  | -3.32                  |
| Assays                                                                                                                                               | $R_{(S/L)}$ | Number of extractions | Time (min) | Experimental values | Predicted values | Relative deviation (%) |
| <b>Total all-<i>trans</i>-<math>\beta</math>-carotene (<math>\mu\text{g}_{\text{carotenoids}} \cdot \text{g}_{\text{dried biomass}}^{-1}</math>)</b> |             |                       |            |                     |                  |                        |
| V1                                                                                                                                                   |             |                       |            | 55.5                |                  | 16.57                  |
| V2                                                                                                                                                   | -1.68       | 0                     | +1.68      | 49.14               | 46.30            | 5.77                   |
| V3                                                                                                                                                   |             |                       |            | 48.2                |                  | 3.94                   |

**Table S4.** Kinetic parameters obtained by fitting HPLC data for degradation of carotenoids during the extracts' thermal treatment obtained with acetone and [C<sub>4</sub>mim][BF<sub>4</sub>] in both the organic and aqueous media.

| Media   | Temperature ± 1<br>(°C) | Parameters     | Carotenoids' extract   |                                        |
|---------|-------------------------|----------------|------------------------|----------------------------------------|
|         |                         |                | Acetone                | [C <sub>4</sub> mim][BF <sub>4</sub> ] |
| Oily    | 60                      | y <sub>0</sub> | 0.877                  | 0.867                                  |
|         |                         | y <sub>∞</sub> | 41340.5                | -65848.8                               |
|         |                         | A <sub>1</sub> | -0.17                  | -0.67                                  |
|         |                         | γ <sub>1</sub> | 126.6                  | 2.24                                   |
|         |                         | A <sub>2</sub> | -41340.3               | 65849.3                                |
|         |                         | γ <sub>2</sub> | 7.87 x 10 <sup>8</sup> | -2.41 x 10 <sup>7</sup>                |
| Oily    | 90                      | y <sub>0</sub> | 0.877                  | 0.867                                  |
|         |                         | y <sub>∞</sub> | 0.58                   | 45296.3                                |
|         |                         | A <sub>1</sub> | -0.27                  | -0.68                                  |
|         |                         | γ <sub>1</sub> | 26.1                   | 1.74                                   |
|         |                         | A <sub>2</sub> | -0.23                  | -45295.6                               |
|         |                         | γ <sub>2</sub> | 614.3                  | 1.05 x 10 <sup>7</sup>                 |
| Aqueous | 60                      | y <sub>0</sub> | 0.807                  | 0.819                                  |
|         |                         | y <sub>∞</sub> | -0.09                  | 0.22                                   |
|         |                         | A <sub>1</sub> | -0.64                  | -0.11                                  |
|         |                         | γ <sub>1</sub> | 2.51                   | 1.41                                   |
|         |                         | A <sub>2</sub> | 0.68                   | -0.10                                  |
|         |                         | γ <sub>2</sub> | -124.1                 | 840.2                                  |
| Aqueous | 90                      | y <sub>0</sub> | 0.902                  | 0.819                                  |
|         |                         | y <sub>∞</sub> | 1.83                   | 0.31                                   |
|         |                         | A <sub>1</sub> | -0.23                  | -0.10                                  |
|         |                         | γ <sub>1</sub> | 1.04                   | 0.58                                   |
|         |                         | A <sub>2</sub> | -1.63                  | -0.21                                  |
|         |                         | γ <sub>2</sub> | 46.2                   | 82.5                                   |

**Table S5.** Yield of extraction of carotenoids obtained by using the same [C<sub>4</sub>mim][BF<sub>4</sub>] used for 10 cycles compared to the yield obtained when acetone is used.

| <b>Assays</b>      | <b>Yield of extraction of carotenoids (µg<sub>carotenoids</sub>·g<sub>dried biomass</sub><sup>-1</sup>)</b> | <b>all-<i>trans</i>-β-carotene (µg<sub>carotenoids</sub>·g<sub>dried biomass</sub><sup>-1</sup>)</b> | <b>all-<i>trans</i>-lycopene (µg<sub>carotenoids</sub>·g<sub>dried biomass</sub><sup>-1</sup>)</b> | <b>all-<i>trans</i>-γ-carotene (µg<sub>carotenoids</sub>·g<sub>dried biomass</sub><sup>-1</sup>)</b> | <b>[C<sub>4</sub>mim][BF<sub>4</sub>] recovery (%)</b> |        |           |               |            |          |
|--------------------|-------------------------------------------------------------------------------------------------------------|------------------------------------------------------------------------------------------------------|----------------------------------------------------------------------------------------------------|------------------------------------------------------------------------------------------------------|--------------------------------------------------------|--------|-----------|---------------|------------|----------|
| <b>Acetone</b>     | 88.37 ± 9.70 <sup>b</sup>                                                                                   | 30.99 ± 1.03 <sup>b</sup>                                                                            | 8.09 ± 0.50 <sup>b</sup>                                                                           | 16.05 ± 0.58 <sup>b</sup>                                                                            | -                                                      |        |           |               |            |          |
| <b>IL recycled</b> |                                                                                                             |                                                                                                      |                                                                                                    |                                                                                                      |                                                        |        |           |               |            |          |
| <b>Cycle 0</b>     | 142.97 ± 11.42 <sup>a</sup>                                                                                 | 45.34 ± 1.95 <sup>a</sup>                                                                            | 15.23 ± 1.53 <sup>a</sup>                                                                          | 19.38 ± 3.03 <sup>a</sup>                                                                            | 92.30                                                  |        |           |               |            |          |
| <b>Cycle 1</b>     | 144.97 ± 17.08 <sup>a</sup>                                                                                 | 47.17 ± 4.20 <sup>a</sup>                                                                            | 14.63 ± 2.13 <sup>a</sup>                                                                          | 20.86 ± 2.86 <sup>a</sup>                                                                            | 96.95                                                  |        |           |               |            |          |
| <b>Cycle 2</b>     | 141.86 ± 4.38 <sup>a</sup>                                                                                  | 46.49 ± 1.64 <sup>a</sup>                                                                            | 13.17 ± 0.50 <sup>a</sup>                                                                          | 20.08 ± 0.81 <sup>a</sup>                                                                            | 91.24                                                  |        |           |               |            |          |
| <b>Cycle 3</b>     | 164.04 ± 12.37 <sup>a</sup>                                                                                 | 52.70 ± 3.58 <sup>a</sup>                                                                            | 14.72 ± 1.10 <sup>a</sup>                                                                          | 23.04 ± 1.31 <sup>a</sup>                                                                            | 94.43                                                  |        |           |               |            |          |
| <b>Cycle 4</b>     | 141.03 ± 17.08 <sup>a</sup>                                                                                 | 45.18 ± 4.34 <sup>a</sup>                                                                            | 12.13 ± 1.42 <sup>a</sup>                                                                          | 22.07 ± 2.66 <sup>a</sup>                                                                            | 90.16                                                  |        |           |               |            |          |
| <b>Cycle 5</b>     | 123.17 ± 12.15 <sup>a</sup>                                                                                 | 41.65 ± 3.56 <sup>a</sup>                                                                            | 11.41 ± 0.82 <sup>a</sup>                                                                          | 17.21 ± 1.60 <sup>b</sup>                                                                            | 89.40                                                  |        |           |               |            |          |
| <b>Cycle 6</b>     | 115.01 ± 7.60 <sup>a</sup>                                                                                  | 36.64 ± 1.76 <sup>a</sup>                                                                            | 10.91 ± 1.56 <sup>a</sup>                                                                          | 15.60 ± 0.80 <sup>b</sup>                                                                            | 92.60                                                  |        |           |               |            |          |
| <b>Cycle 7</b>     | 107.33 ± 6.52 <sup>a</sup>                                                                                  | 34.39 ± 1.95 <sup>a</sup>                                                                            | 10.39 ± 0.32 <sup>a</sup>                                                                          | 15.76 ± 0.89 <sup>b</sup>                                                                            | 94.38                                                  |        |           |               |            |          |
| <b>Cycle 8</b>     | 111.26 ± 12.85 <sup>a</sup>                                                                                 | 36.09 ± 3.33 <sup>a</sup>                                                                            | 10.28 ± 1.04 <sup>a</sup>                                                                          | 16.36 ± 2.04 <sup>b</sup>                                                                            | 95.64                                                  |        |           |               |            |          |
| <b>Cycle 9</b>     | 114.51 ± 7.97 <sup>a</sup>                                                                                  | 37.56 ± 0.92 <sup>a</sup>                                                                            | 12.52 ± 1.17 <sup>a</sup>                                                                          | 15.94 ± 0.76 <sup>b</sup>                                                                            | 95.34                                                  |        |           |               |            |          |
| <b>Cycle 10</b>    | 104.98 ± 12.2 <sup>b</sup>                                                                                  | 33.47 ± 4.89 <sup>b</sup>                                                                            | 10.83 ± 0.30 <sup>a</sup>                                                                          | 14.61 ± 2.15 <sup>b</sup>                                                                            | 95.63                                                  |        |           |               |            |          |
| *                  | Same                                                                                                        | letters                                                                                              | in                                                                                                 | the                                                                                                  | same                                                   | column | represent | statistically | equivalent | results. |

**Table S6.** Real and coded values used in the fractional experimental design with three central points ( $2^{5-1}$ ) and CCRD ( $2^3$ ).

| <b>Factorial design</b>                            | <b>Coded variable level</b> | <b>Ionic liquid proportion</b>       | <b>R<sub>(S/L)</sub></b> | <b>Number of extractions</b> | <b>Time (min)</b> | <b>R<sub>(IL/E)</sub></b> |
|----------------------------------------------------|-----------------------------|--------------------------------------|--------------------------|------------------------------|-------------------|---------------------------|
| <b>Fractional</b><br><b>(<math>2^{5-1}</math>)</b> | -1                          | 1 IL <sub>1</sub> :0 IL <sub>2</sub> | 1:2                      | 2                            | 2.5               | 1:3                       |
|                                                    | 0                           | 1 IL <sub>1</sub> :1 IL <sub>2</sub> | 1:3                      | 3                            | 5.0               | 1:2                       |
|                                                    | +1                          | 0 IL <sub>2</sub> :1 IL <sub>2</sub> | 1:4                      | 4                            | 7.5               | 1:1                       |
| <b>CCRD</b><br><b>(<math>2^3</math>)</b>           | -1.68                       | -                                    | 1:1                      | 1                            | 3.0               | -                         |
|                                                    | -1                          | -                                    | 1:2                      | 2                            | 5.0               | -                         |
|                                                    | 0                           | -                                    | 1:4                      | 4                            | 7.5               | -                         |
|                                                    | +1                          | -                                    | 1:6                      | 6                            | 10.0              | -                         |
|                                                    | +1.68                       | -                                    | 1:7                      | 7                            | 12.0              | -                         |

**Table S7.** Chromatographic, UV-Vis and mass spectroscopy characteristics of carotenoids from *Bactris gasipaes* pulp fruits, obtained by HPLC-PDA-MS/MS.

| Peak | Carotenoid                    | t <sub>R</sub> (min) <sup>a</sup> | λ <sub>(max)</sub> <sup>b</sup> | % III/II | % A <sub>B</sub> /II | [M+H] <sup>+</sup><br>(m/z) | Fragment ions (m/z)      |
|------|-------------------------------|-----------------------------------|---------------------------------|----------|----------------------|-----------------------------|--------------------------|
| 1    | <i>cis</i> -β-carotene        | 15.1                              | 339, 420, 443, 467              | 12       | 47                   | 537                         | 444 [M-92]               |
| 2    | all- <i>trans</i> -α-carotene | 16.1                              | 418, 445, 472                   | 0        | 50                   | 537                         | 481 [M-H-56], 444 [M-92] |
| 3    | all- <i>trans</i> -β-carotene | 18.5                              | 421, 451, 477                   | 25       | 0                    | 537                         | 444 [M-92]               |
| 4    | <i>cis</i> -δ-carotene (1)    | 19.8                              | 348, 432, 453                   | 0        | 49                   | 537                         | 444 [M-92]               |
| 5    | <i>cis</i> -δ-carotene (2)    | 22.4                              | 348, 430, 453, 481              | 16       | 46                   | 537                         | 444 [M-92]               |
| 6    | <i>cis</i> -δ-carotene (3)    | 24.1                              | 349, 430, 453, 482              | 41       | 42                   | 537                         | 444 [M-92]               |
| 7    | all- <i>trans</i> -δ-carotene | 24.9                              | 430, 455, 485                   | 46       | 0                    | 537                         | 481 [M+H-56], 444 [M-92] |
| 8    | <i>cis</i> -γ-carotene (1)    | 25.6                              | 300, 360, 434, 458, 488         | 45       | 18                   | 537                         | 467 [M-69], 444 [M-92]   |
| 9    | <i>cis</i> -γ-carotene (2)    | 30.0                              | (-), 430, 459, 490              | 66       | 0                    | 537                         | 467 [M-69], 444 [M-92]   |
| 10   | all- <i>trans</i> -γ-carotene | 31.0                              | 430, 460, 491                   | 50       | 36                   | 537                         | 467 [M-69], 444 [M-92]   |
| 11   | <i>cis</i> -lycopene          | 39.7                              | 300, 360, 440, 465, 496         | 70       | 18                   | 537                         | 467 [M-69], 444 [M-92]   |
| 12   | all- <i>trans</i> -lycopene   | 58.4                              | 445, 471, 502                   | 70       | 0                    | 537                         | 467 [M-69], 444 [M-92]   |

<sup>a</sup>Retention time on C<sub>30</sub> column; <sup>b</sup>Linear gradient of methanol/MTBE; λ<sub>max</sub>: maximum absorption wavelength (nm); % III/II: spectral fine structure; % AB/II: intensity of *cis* peak.



## Figures

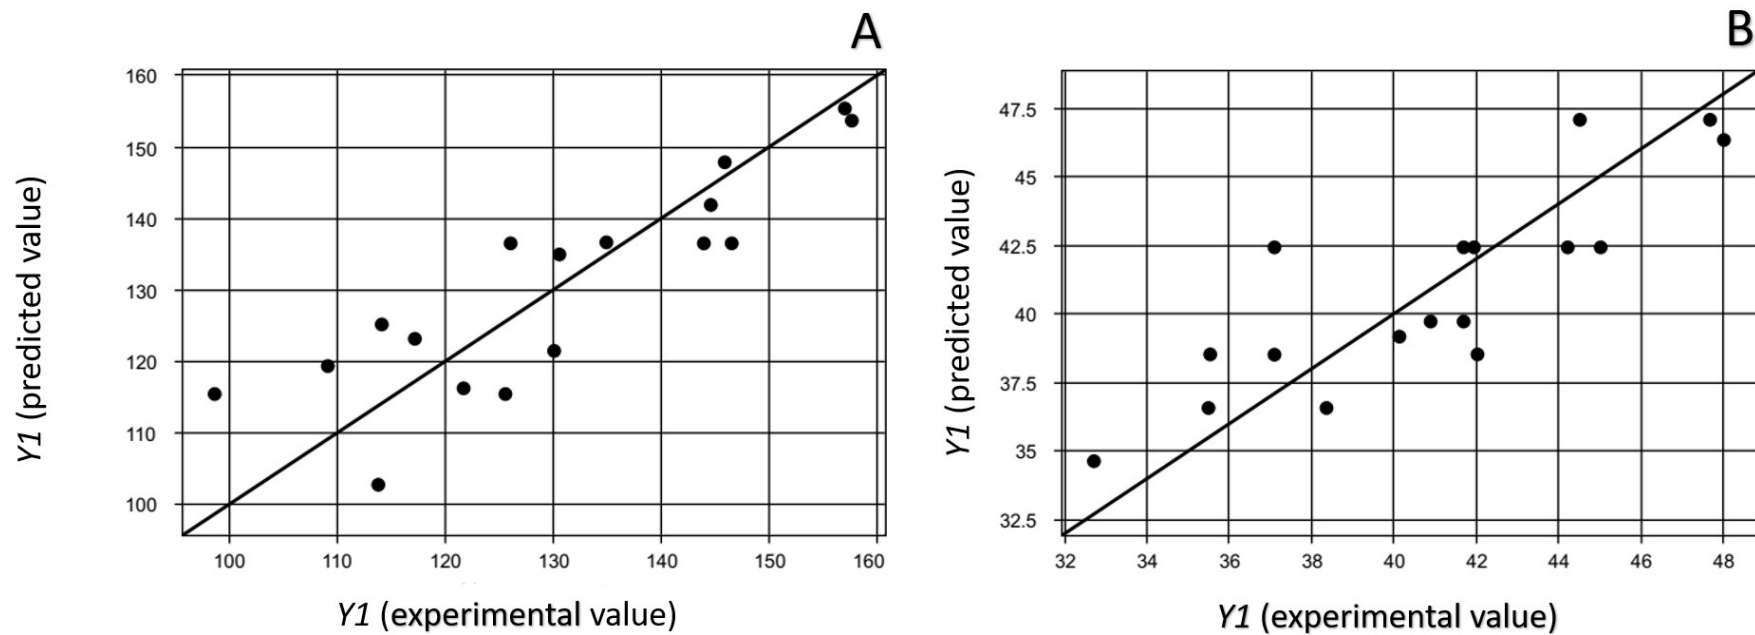

**Figure S1.** Graphical representation of the predicted vs experimental values by the model when  $[C_4mim][BF_4]$  was used as solvent in the extraction of carotenoids from peach palm fruit. **(A)** total carotenoids content, **(B)** total all-*trans*-β-carotene.

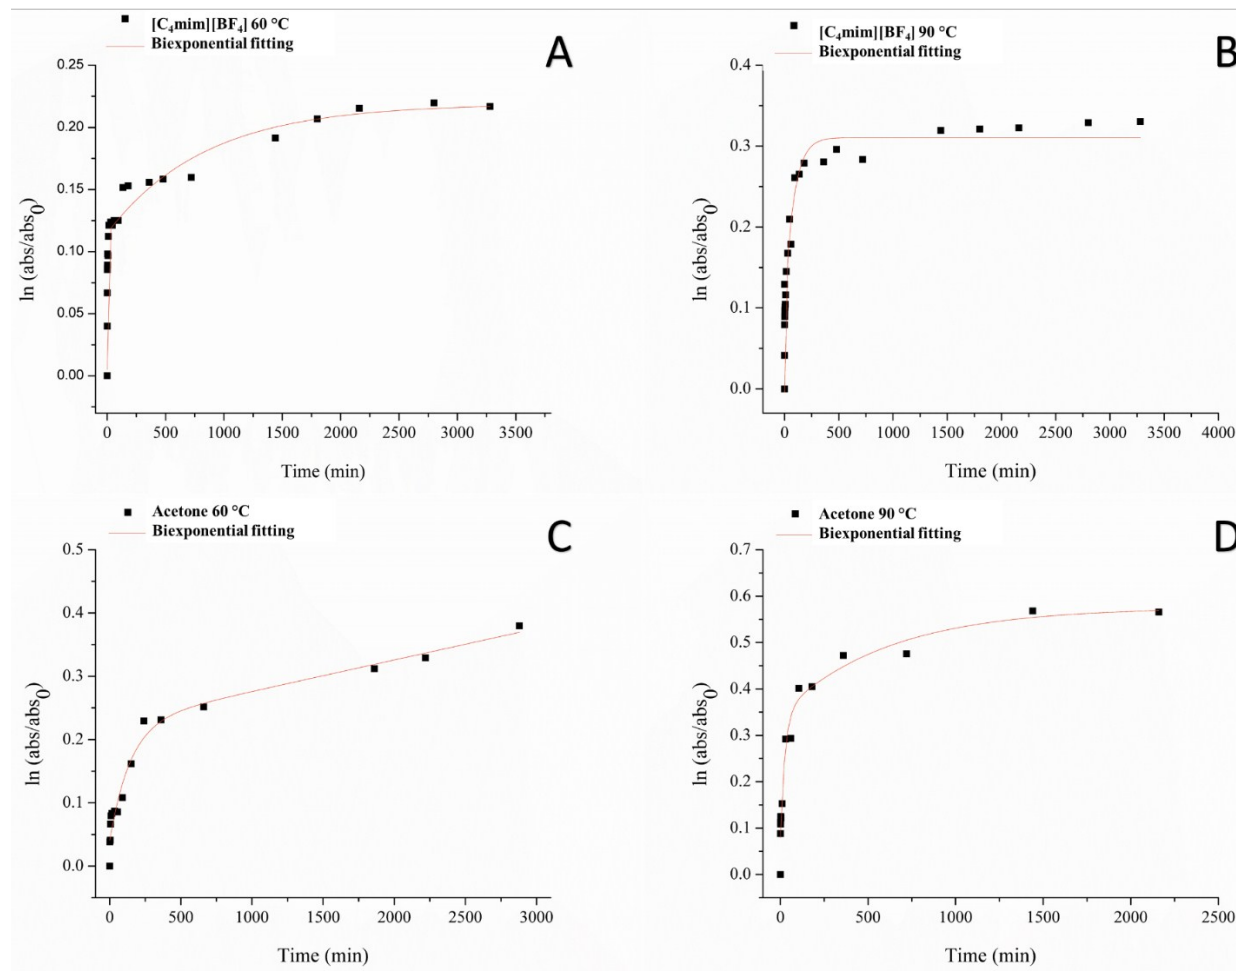

**Figure S2.** Kinetic of degradation of the carotenoids extracted with  $[\text{C}_4\text{mim}][\text{BF}_4]$  at 60 °C (A) and 90 °C (B); acetone at 60 °C (C) and 90 °C (D) in aqueous medium. The coefficient of correlation of all curves are  $R^2 \geq 0.97$ .

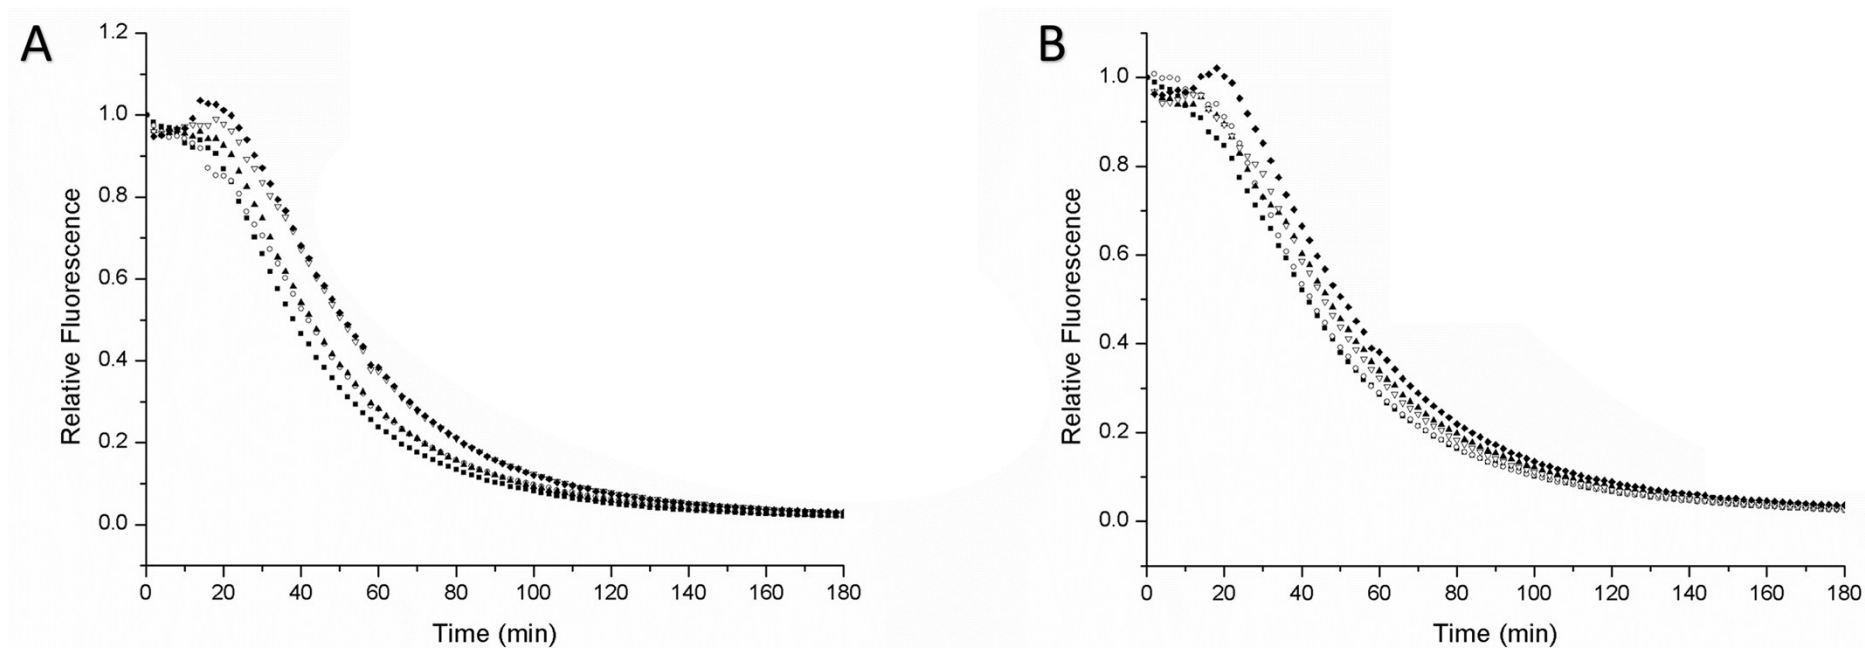

**Figure S3.** Fluorescence decay of C<sub>11</sub>-BODIPY<sup>581/591</sup> induced by the peroxy radicals generated from thermal decomposition using different concentrations of AIBN at 42°C, applying (A) [C<sub>4</sub>mim][BF<sub>4</sub>], and (B) acetone. The NET AUC *versus* concentration for the antioxidant activity response from the extracts was  $r^2 > 0.9$ .

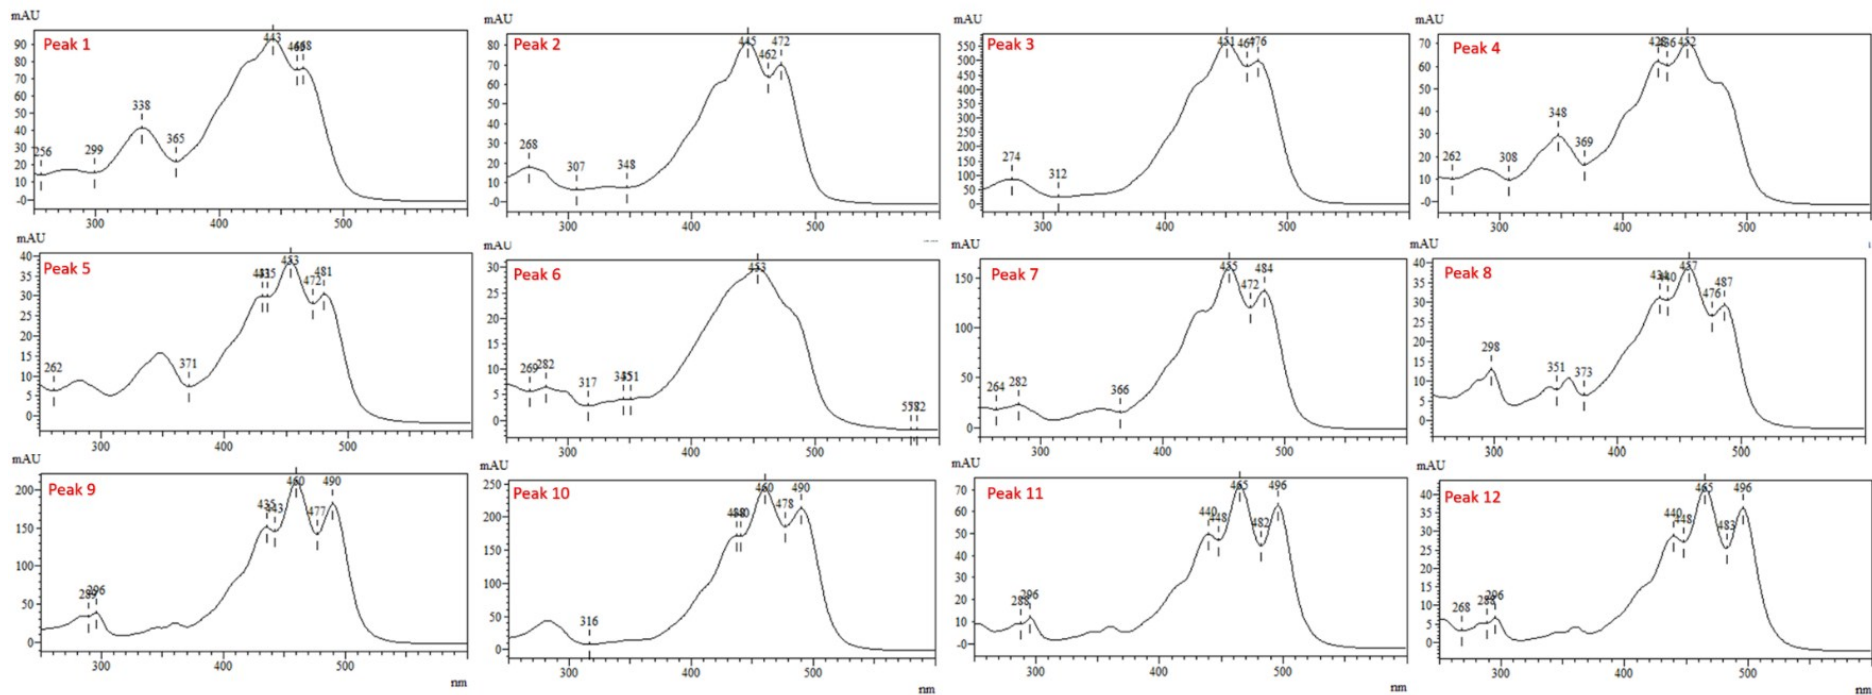

**Figure S4.** UV-vis spectra at 453 nm of each peak representing each carotenoid present in the biomass (*B. gasipaes* fruits).

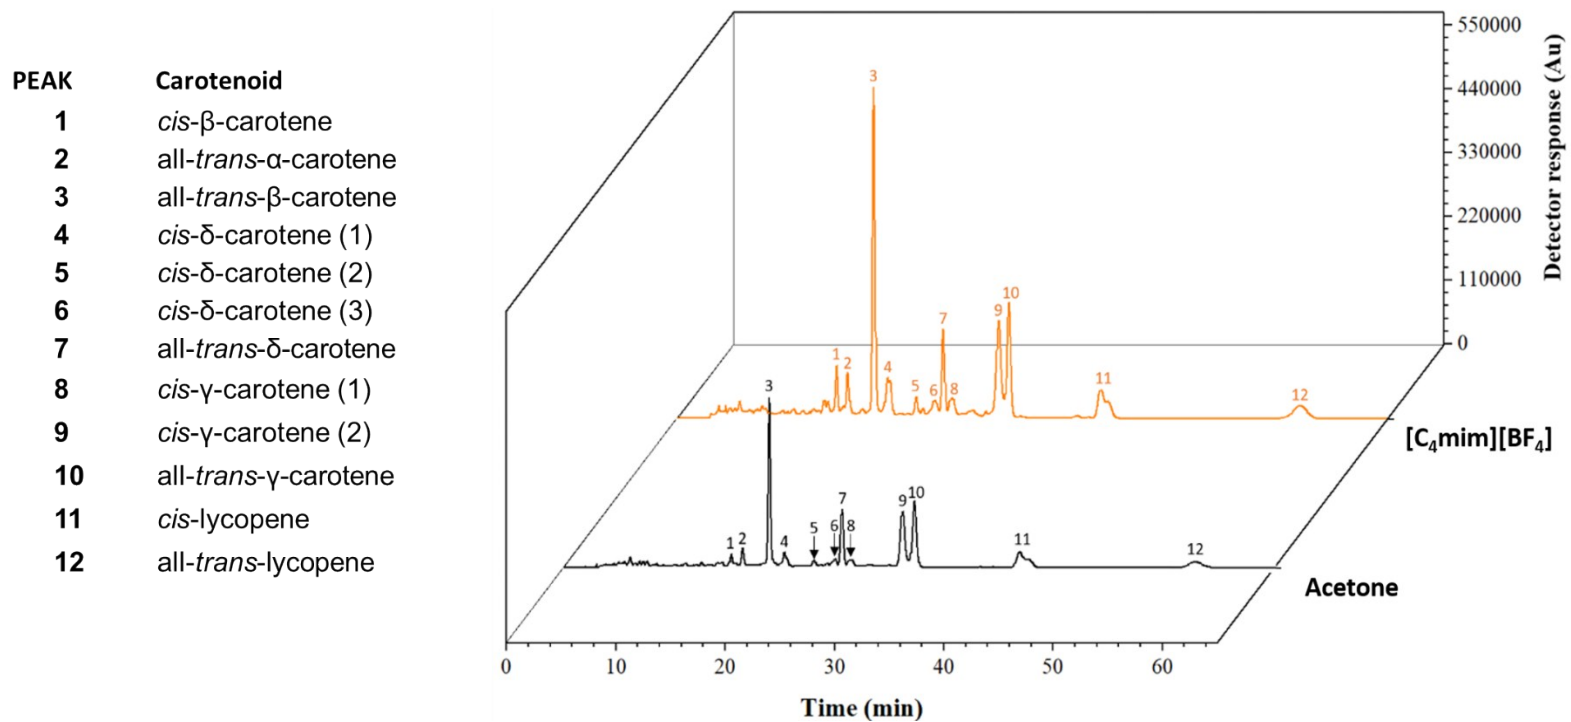

**Figure S5.** Chromatogram obtained by HPLC-PDA on the analysis of the carotenoids extracted from peach palm fruit. The orange profile represents the chromatogram obtained when [C<sub>4</sub>mim][BF<sub>4</sub>] was used; the black profile corresponds to the chromatogram obtained for acetone as solvent.

## Section S1. ILs' synthesis

1-butyl-3-methylimidazolium chloride ([C<sub>4</sub>mim]Cl) was synthesized in a round-bottom flask by mixing 0.5 mol of 1-butyl-3-methylimidazole and 0.5 mol of 1-chloro-butane. The content was stirred at 150 rpm with a magnetic stirrer at 80 °C for 72 h. A viscous yellow-reddish liquid was obtained and crystallized at -40 °C. To prepare 1-butyl-3-methylimidazolium hexafluorophosphate ([C<sub>4</sub>mim][PF<sub>6</sub>]), an ion exchange reaction was performed. Briefly, a mixture containing 0.05 mol of [C<sub>4</sub>mim]Cl and 0.05 mol of potassium hexafluorophosphate in distilled water was shaken vigorously for 45 min. The upper aqueous phase formed after shaking was separated and discarded. Then, 40 mL of distilled water was added and stirred for 15 min. Afterwards, 40 mL of chloroform was added, and the organic phase was separated and dried under vacuum, in which a slightly yellowish viscous liquid [C<sub>4</sub>mim][PF<sub>6</sub>] was obtained, with a purity level of ~97%.

## Section S2. Environmental assessment

The carbon footprint is the sum of the greenhouse gas (GHG) emissions of the system, expressed as carbon dioxide equivalent (CO<sub>2eq</sub>), and calculated according to Equation S1.

$$CF = \frac{\sum (A_i \times GHG_i)}{C} \quad \text{Eq. S1}$$

where CF is the carbon footprint of each scenario (g<sub>CO<sub>2eq</sub></sub>, μg<sub>carotenoids</sub><sup>-1</sup>), A<sub>i</sub> is the amount of each input *i* presented in Table 2, except fruit, for each scenario (units in Table 2: g, mL or Wh), GHG<sub>i</sub> is the GHG emission factor of each input *i* presented in Table 3 (units in Table 3: kg<sub>CO<sub>2eq</sub></sub> kg<sup>-1</sup> or kg<sub>CO<sub>2eq</sub></sub> kWh<sup>-1</sup>), and C is the amount of carotenoids extracted in each scenario presented in Table 2 (in μg<sub>carotenoids</sub>).

The carbon footprint of fruit production was excluded from this study because fruits are considered as a residue and thus, all GHG emissions from *Bactris gasipaes* cultivation are allocated to the main product (palm heart).

The A<sub>i</sub> values considered for chemicals and water were obtained during the experiments based on the real amounts consumed. The A<sub>i</sub> values for electricity were estimated based on the time of operation and nominal power of each equipment. Thus, they can be overestimated as the real power can be lower than the nominal power.

The GHG<sub>i</sub> values were taken from the Ecoinvent database. For [C<sub>4</sub>mim][BF<sub>4</sub>] and Celite 545, GHG<sub>i</sub> values were not available in the database and GHG<sub>i</sub> values from similar chemicals were used instead, as explained in Table 3. However, this approximation has low effect in the total carbon footprint of the system as the contribution of these chemicals is very small. Table S8 presents the contribution of each input to the total carbon footprint for each scenario.

**Table S8.** Breakdown of the carbon footprint for the three scenarios assessed in this work.

|                                           | Scenario 1                                                            |      | Scenario 2                                                            |      | Scenario 3                                                            |      |
|-------------------------------------------|-----------------------------------------------------------------------|------|-----------------------------------------------------------------------|------|-----------------------------------------------------------------------|------|
|                                           | $\frac{\text{gCO}_2\text{eq}}{\mu\text{g}_{\text{carotenoids}}^{-1}}$ | %    | $\frac{\text{gCO}_2\text{eq}}{\mu\text{g}_{\text{carotenoids}}^{-1}}$ | %    | $\frac{\text{gCO}_2\text{eq}}{\mu\text{g}_{\text{carotenoids}}^{-1}}$ | %    |
| <b>Electricity</b>                        | 1.32                                                                  | 39.0 | 1.47                                                                  | 87.5 | 1.08                                                                  | 25.2 |
| <i>Fruit freezing</i>                     | $1.96 \times 10^{-6}$                                                 |      | $2.17 \times 10^{-6}$                                                 |      | $3.15 \times 10^{-6}$                                                 |      |
| <i>Fruit lyophilization</i>               | $1.23 \times 10^{-4}$                                                 |      | $1.37 \times 10^{-4}$                                                 |      | $1.99 \times 10^{-4}$                                                 |      |
| <i>Ultrasonic homogenization</i>          | 0.460                                                                 |      | 0.513                                                                 |      | -                                                                     |      |
| <i>Filtration</i>                         | 0.0243                                                                |      | 0.0271                                                                |      | 0.0687                                                                |      |
| <i>IL freezing</i>                        | $7.63 \times 10^{-4}$                                                 |      | $8.50 \times 10^{-4}$                                                 |      | -                                                                     |      |
| <i>Rotary evaporation</i>                 | 0.830                                                                 |      | 0.926                                                                 |      | 1.01                                                                  |      |
| <b>Water</b>                              | $2.10 \times 10^{-6}$                                                 | ~0   | $2.34 \times 10^{-6}$                                                 | ~0   | 0.0340                                                                | 0.8  |
| <b>[C<sub>4</sub>mim][BF<sub>4</sub>]</b> | 0.0529                                                                | 1.6  | $5.36 \times 10^{-3}$                                                 | 0.3  | -                                                                     | -    |
| <b>Ethanol</b>                            | 2.01                                                                  | 59.4 | 0.203                                                                 | 12.1 | -                                                                     | -    |
| <b>Acetone</b>                            | -                                                                     | -    | -                                                                     | -    | 1.43                                                                  | 33.5 |
| <b>Celite 545</b>                         | -                                                                     | -    | -                                                                     | -    | 0.0391                                                                | 0.9  |
| <b>Ethyl ether</b>                        | -                                                                     | -    | -                                                                     | -    | 1.54                                                                  | 36.0 |
| <b>Petroleum ether</b>                    | -                                                                     | -    | -                                                                     | -    | 0.156                                                                 | 3.6  |
